# Supplementary material
Source: PubMed Central journal article supplement (PMC10233281)
Supplement: dead055_supplementary_figure_s1.pdf [file dead055_supplementary_figure_s1.pdf]

human reproduction SUPPLEMENTARY DATA

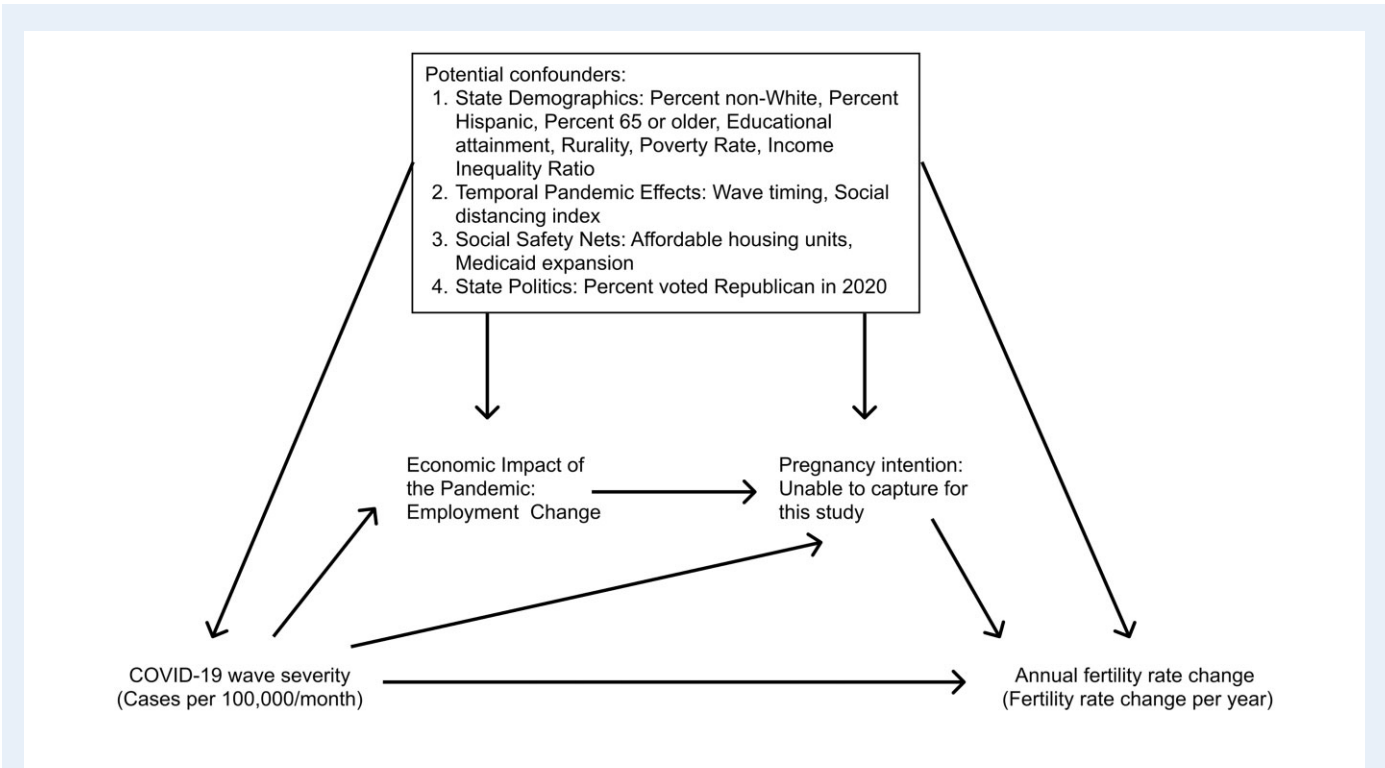

**Supplementary Figure S1. Directed acyclic graph of relation between COVID-19 wave severity and annual fertility rate change in the USA.** Our main exposure of interest (coronavirus disease 2019 (COVID-19) wave severity) is on the left and our outcome of interest (annual fertility rate change) is on the right. The top box shows potential confounders for which we consider adjusting for in our multivariate analysis to close potential backdoor pathways. In the middle, two variables (economic impact of pandemic and pregnancy intention) are presented as potential mediating pathways for our exposure-outcome relation.
