# Supplementary material
Source: PubMed Central journal article supplement (PMC10233281)
Supplement: dead055_supplementary_figure_s2.pdf [file dead055_supplementary_figure_s2.pdf]

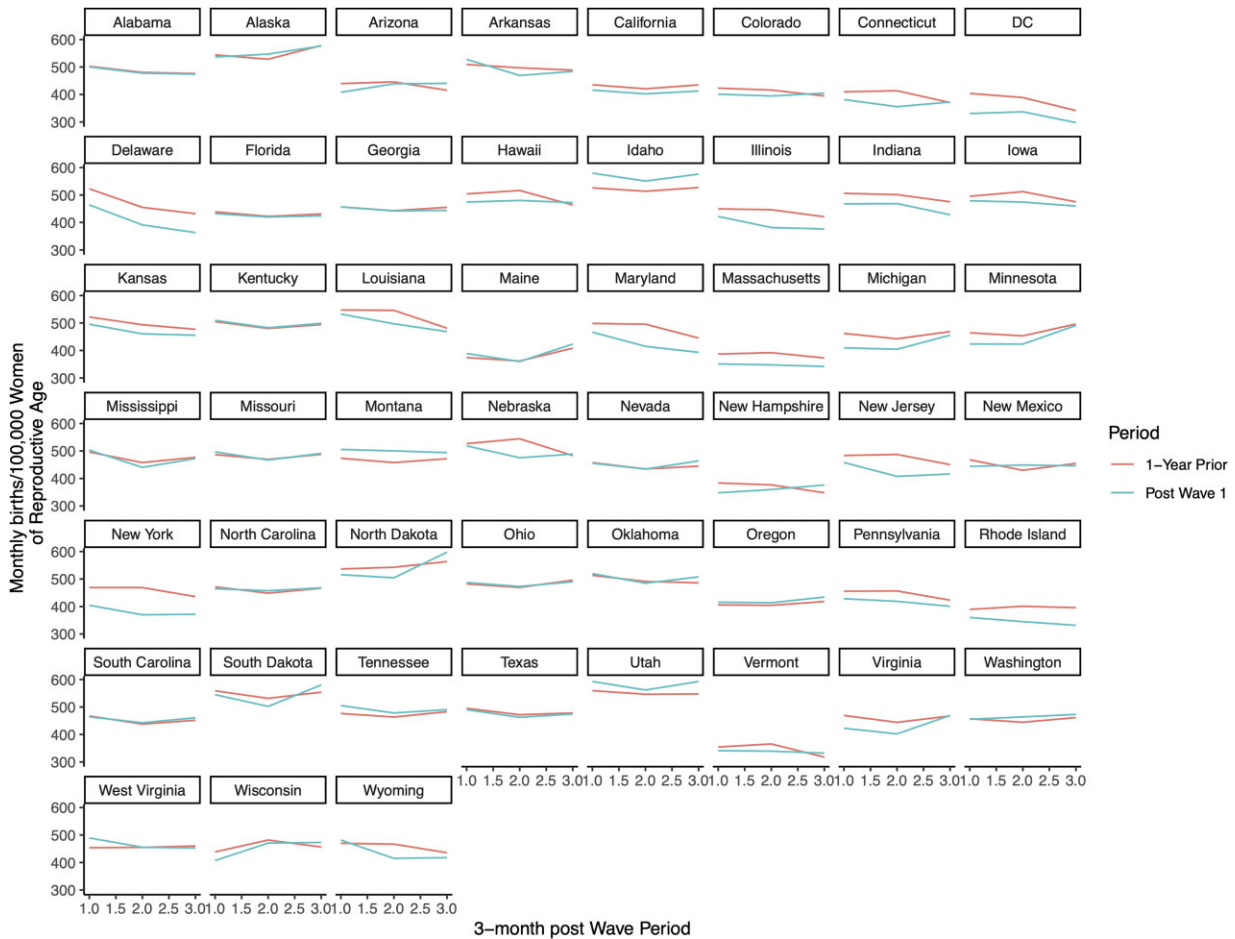

**Supplementary Figure S2. Annual change in monthly fertility rate following Wave I.** This visualization compares the average monthly fertility rate 9-months after the first coronavirus disease 2019 (COVID-19) wave (Post Wave I, teal) vs a year prior (1 Year Prior, pink). US states are presented separately in alphabetical order. The x-axis is the 3-month period of interest and the y-axis is the monthly fertility rate.
