# Supplementary material
Source: PubMed Central journal article supplement (PMC10233281)
Supplement: dead055_supplementary_figure_s3.pdf [file dead055_supplementary_figure_s3.pdf]

human reproduction **SUPPLEMENTARY DATA**

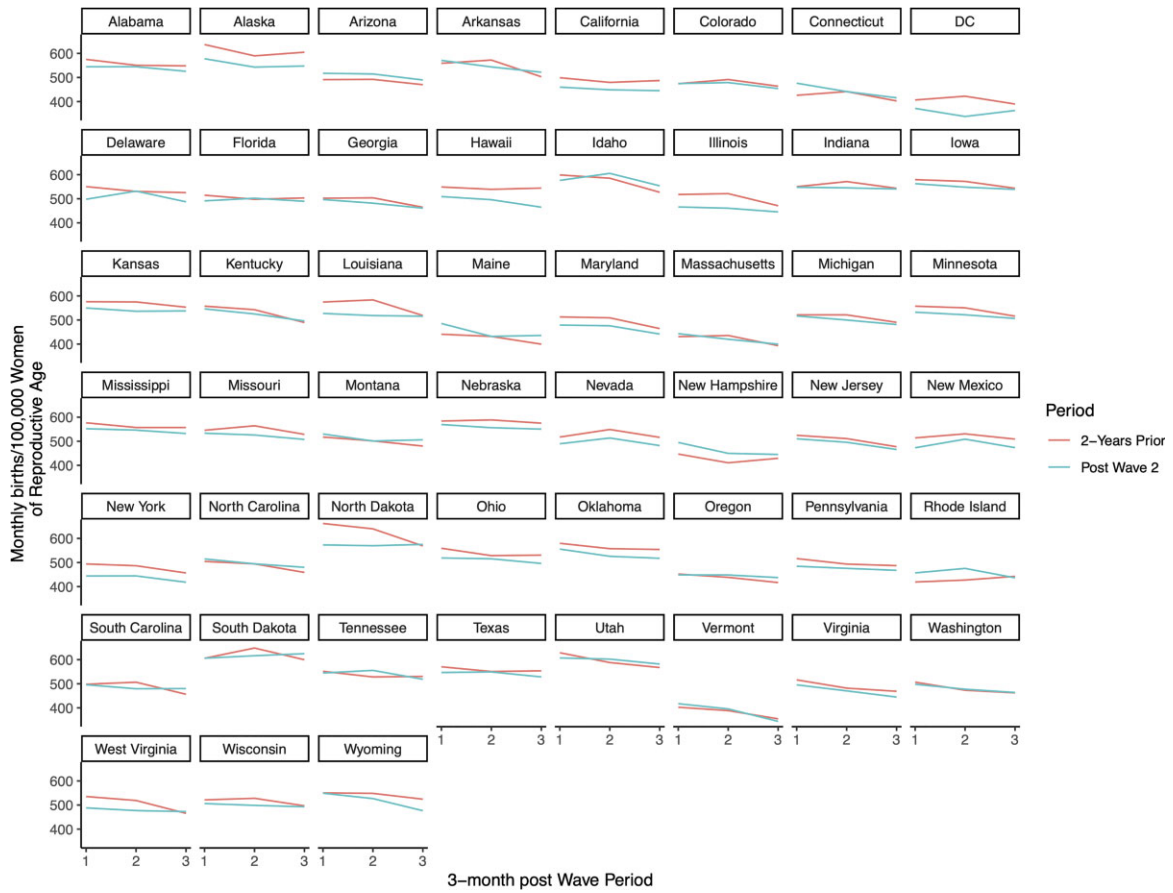

**Supplementary Figure S3. Biannual change in monthly fertility rate following Wave 2.** This visualization compares the average monthly fertility rate 9 months after the second coronavirus disease 2019 (COVID-19) wave (Post Wave 2, teal) vs 2 years prior (2 Years Prior, pink). We used 2 years prior since 1 year prior would have been after the COVID-19 pandemic had begun. US states are presented separately in alphabetical order. The x-axis is the 3-month period of interest and the y-axis is the monthly fertility rate.
