# Supplementary material
Source: PubMed Central journal article supplement (PMC10233281)
Supplement: dead055_supplementary_figure_s4.pdf [file dead055_supplementary_figure_s4.pdf]

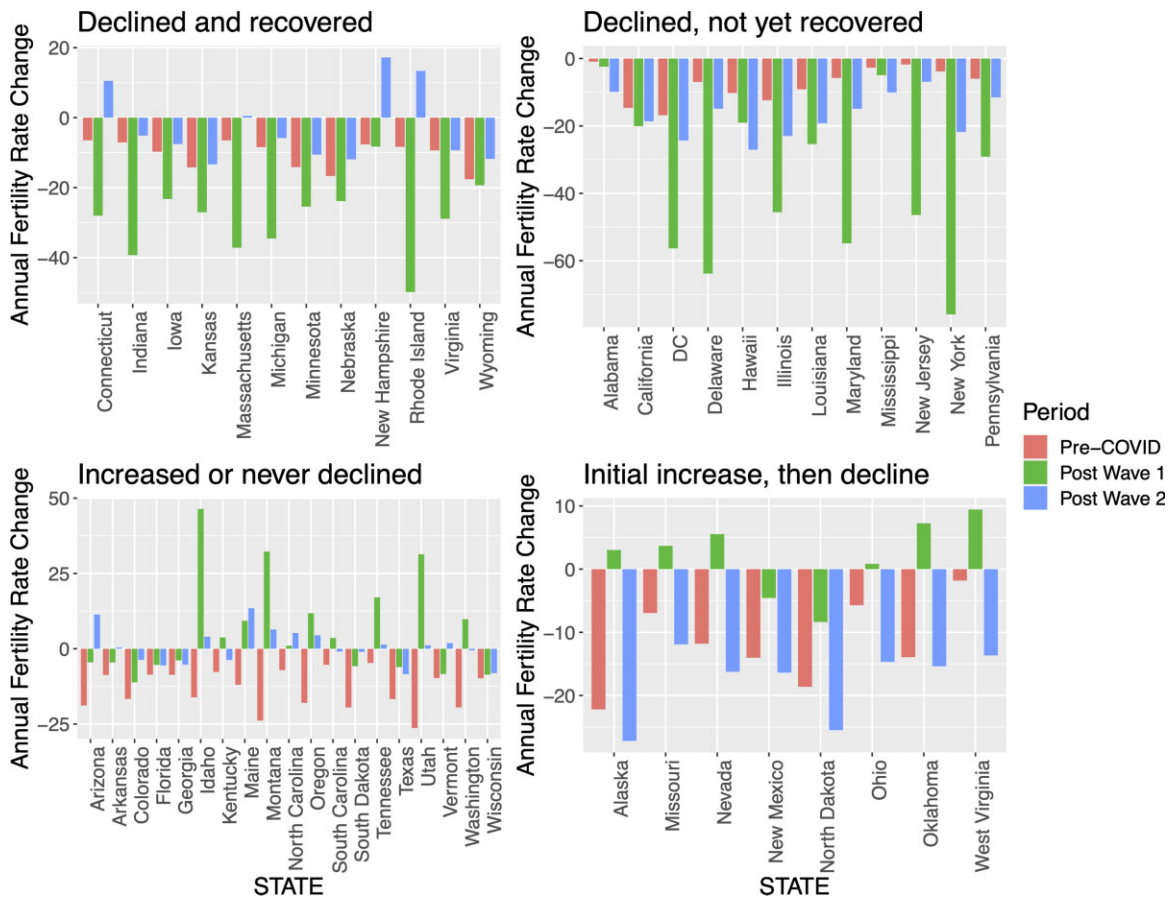

**Supplementary Figure S4. State-specific annual fertility rate changes throughout the pandemic.** All US states had declining fertility rates pre-coronavirus disease 2019 (COVID). Following the first two waves, we observed four general trends across US states: annual fertility rate declined further following Wave 1 but recovered by Wave 2; annual fertility rate declined further following Wave 1 and did not recover following Wave 2; annual fertility rate increased from baseline following Wave 1 and Wave 2; and annual fertility rate increased following Wave 1 but declined following Wave 2. Annual fertility rate change is average monthly births/100 000 reproductive aged women/year.
