# Supplementary material
Source: PubMed Central journal article supplement (PMC10233281)
Supplement: dead055_supplementary_figure_s5.pdf [file dead055_supplementary_figure_s5.pdf]

human reproduction SUPPLEMENTARY DATA

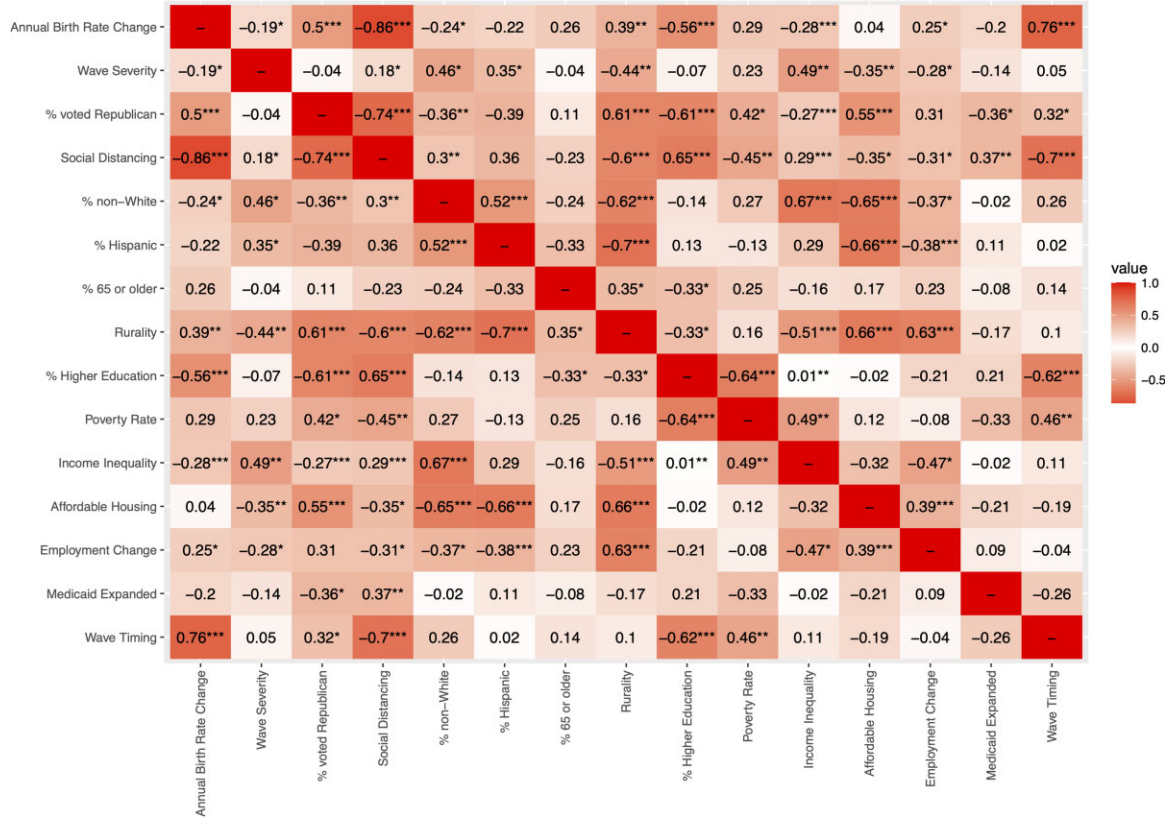

**Supplementary Figure S5. Correlation matrix of all variables for Wave I.** This heatmap shows the Spearman correlation coefficients comparing the outcome, exposure, and potential confounders for Wave I in the USA.
