# Supplementary material
Source: PubMed Central journal article supplement (PMC10233281)
Supplement: dead055_supplementary_figure_s6.pdf [file dead055_supplementary_figure_s6.pdf]

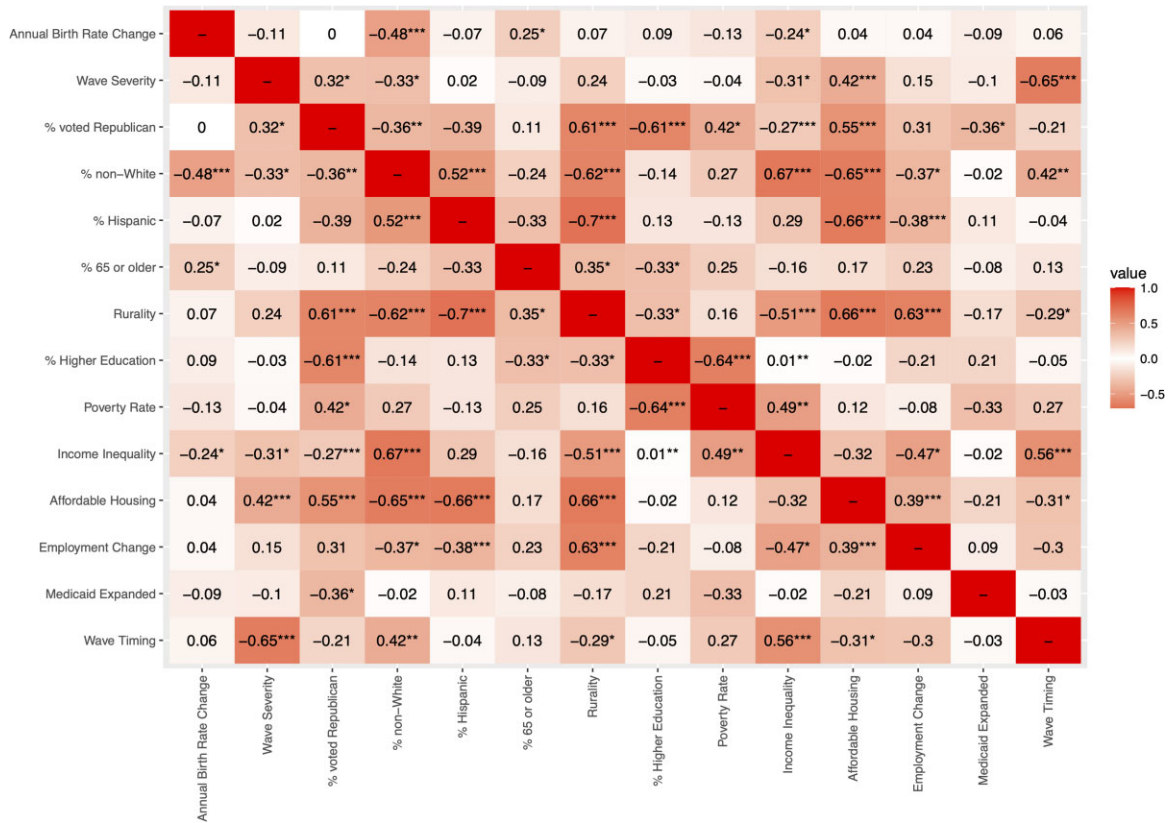

**Supplementary Figure S6. Correlation matrix of all variables for Wave 2.** This heatmap shows the Spearman correlation coefficients comparing the outcome, exposure, and potential confounders for Wave 2 in the USA. Social Distancing Index is not included, as data were only available for Wave 1.
