# Supplementary material
Source: PubMed Central journal article supplement (PMC10233281)
Supplement: dead055_supplementary_table_si.pdf [file dead055_supplementary_table_si.pdf]

human reproduction SUPPLEMENTARY DATA

**Supplementary Table SI Description of variables and data sources.**

| Variable                 | Description                                                                                                                                                                                                                                                                                                                         | Source                                        |
|--------------------------|-------------------------------------------------------------------------------------------------------------------------------------------------------------------------------------------------------------------------------------------------------------------------------------------------------------------------------------|-----------------------------------------------|
| Wave severity            | Difference in COVID-19 cases per 100 000 population from the peak of the wave to the month prior. Calculated separately for each wave.                                                                                                                                                                                              | CDC US Data Tracker <sup>a</sup>              |
| Political leaning        | The percent in each US state that voted Republican in the 2020 election.                                                                                                                                                                                                                                                            | Politico <sup>b</sup>                         |
| Social Distancing Index  | The Social Distancing Index is computed from six mobility metrics collected from cellphone geospatial data: time spent staying at home, reduction of work trips, reduction on non-work trips, reduction of travel distance, and reduction of out-of-country trips compared to equivalent data pre-COVID. Only available for Wave 1. | University of Maryland <sup>c</sup>           |
| Percent non-White        | The percent in each US state that did NOT select 'white alone' for race in 2020 census.                                                                                                                                                                                                                                             | 2020 US Census <sup>d</sup>                   |
| Percent Hispanic         | The percent in each US state that identify as Hispanic or Latino/a.                                                                                                                                                                                                                                                                 | 2020 US Census <sup>d</sup>                   |
| Percent 65 or older      | The percent in each US state population age 65 years and older.                                                                                                                                                                                                                                                                     | 2020 US Census <sup>d</sup>                   |
| Rurality                 | The percent in each US state living in rural conditions.                                                                                                                                                                                                                                                                            | US Department of Agriculture <sup>e</sup>     |
| Education attainment     | The percent in each US state with higher education attainment (associate degree or above).                                                                                                                                                                                                                                          | talkpoverty.org <sup>f</sup>                  |
| Poverty rate             | The percent in each US state that reported income below the poverty line (\$25 926 for a family of four) in 2019.                                                                                                                                                                                                                   | talkpoverty.org <sup>f</sup>                  |
| Income inequality ratio  | The ratio of the share of income going to the top 20% of households and the share of income going to the bottom 20% of households in 2019.                                                                                                                                                                                          | talkpoverty.org <sup>f</sup>                  |
| Affordable housing units | Number of apartments or other units that were affordable and available for every 100 renter households with very low incomes in 2018. Very low-income households are those with incomes at or below half of the median income in the metropolitan or other area where they live.                                                    | talkpoverty.org <sup>f</sup>                  |
| Employment change        | Change in US state employment rate between the end of February and the end of April 2020.                                                                                                                                                                                                                                           | Urban Institute Economic Monitor <sup>g</sup> |
| Medicaid expansion       | Did US state accept Medicaid expansion by 2020? [yes/no]                                                                                                                                                                                                                                                                            | US Department of Health <sup>h</sup>          |
| Wave timing              | Wave 1: did the wave occur before June 2020 (Spring) or during/after June 2020 (Summer)? Wave 2: did the wave occur before November 2020 (Fall) or during/after November 2020 (Winter)?                                                                                                                                             | CDC US Data Tracker <sup>a</sup>              |

COVID-19: coronavirus disease 2019; CDC: Center of Disease Control; US: United States.

<sup>a</sup><https://covid.cdc.gov/covid-data-tracker>.

<sup>b</sup><https://www.politico.com/2020-election/results/president/>.

<sup>c</sup><https://data.covid.umd.edu>.

<sup>d</sup><https://data.census.gov/>.

<sup>e</sup><https://www.ers.usda.gov/topics/rural-economy-population/rural-classifications/>.

<sup>f</sup>[www.talkpoverty.org](http://www.talkpoverty.org).

<sup>g</sup><https://apps.urban.org/features/state-economic-monitor/>.

<sup>h</sup><https://www.hhs.gov/>.
