# Supplementary material
Source: PubMed Central journal article supplement (PMC10233281)
Supplement: dead055_supplementary_table_sii.pdf [file dead055_supplementary_table_sii.pdf]

**Supplementary Table SII** State-specific expected vs observed post-wave fertility rate (births/month/100 000 women of reproductive age).

| State          | Post-Wave 1 fertility rate |          | Post-Wave 2 fertility rate |          |
|----------------|----------------------------|----------|----------------------------|----------|
|                | Observed                   | Expected | Observed                   | Expected |
| Alabama        | 483.91                     | 485.39   | 538.23                     | 556.18   |
| Alaska         | 553.25                     | 528.02   | 556.16                     | 566.11   |
| Arizona        | 429.09                     | 414.77   | 507.16                     | 446.74   |
| Arkansas       | 493.75                     | 489.58   | 545.53                     | 527.32   |
| California     | 410.34                     | 415.75   | 451.39                     | 459.35   |
| Colorado       | 400.15                     | 394.66   | 469.16                     | 443.21   |
| Connecticut    | 369.87                     | 391.43   | 444.45                     | 410.48   |
| Washington, DC | 321.87                     | 361.35   | 357.59                     | 372.58   |
| Delaware       | 406.12                     | 462.97   | 505.66                     | 521.52   |
| Florida        | 425.43                     | 422.16   | 494.29                     | 488.12   |
| Georgia        | 447.71                     | 442.90   | 479.81                     | 472.93   |
| Hawaii         | 475.67                     | 484.49   | 490.01                     | 523.66   |
| Idaho          | 568.74                     | 506.15   | 578.45                     | 538.03   |
| Illinois       | 393.40                     | 426.60   | 457.32                     | 478.48   |
| Indiana        | 454.96                     | 487.17   | 544.62                     | 540.76   |
| Iowa           | 471.04                     | 484.52   | 549.91                     | 545.49   |
| Kansas         | 470.49                     | 483.29   | 541.34                     | 539.55   |
| Kentucky       | 496.96                     | 485.50   | 522.42                     | 514.53   |
| Louisiana      | 499.45                     | 515.72   | 520.46                     | 540.64   |
| Maine          | 390.83                     | 369.58   | 451.04                     | 400.18   |
| Maryland       | 425.00                     | 474.05   | 465.59                     | 483.84   |
| Massachusetts  | 346.84                     | 377.50   | 420.99                     | 406.92   |
| Michigan       | 423.31                     | 449.41   | 499.30                     | 494.09   |
| Minnesota      | 445.89                     | 457.18   | 520.15                     | 513.00   |
| Mississippi    | 472.11                     | 474.34   | 543.53                     | 558.19   |
| Missouri       | 485.15                     | 474.52   | 522.36                     | 532.29   |
| Montana        | 500.06                     | 443.97   | 512.43                     | 452.03   |
| Nebraska       | 494.39                     | 501.58   | 558.73                     | 549.29   |
| Nevada         | 451.27                     | 433.93   | 495.06                     | 503.95   |
| New Hampshire  | 361.34                     | 361.97   | 463.33                     | 413.67   |
| New Jersey     | 427.44                     | 472.11   | 490.58                     | 500.81   |
| New Mexico     | 446.41                     | 436.95   | 485.11                     | 489.84   |
| New York       | 381.97                     | 454.06   | 435.59                     | 471.49   |
| North Carolina | 463.27                     | 455.12   | 496.54                     | 471.80   |
| North Dakota   | 539.26                     | 529.01   | 572.72                     | 586.44   |
| Ohio           | 483.35                     | 476.79   | 510.21                     | 528.14   |
| Oklahoma       | 504.06                     | 482.88   | 533.12                     | 536.01   |
| Oregon         | 421.20                     | 391.42   | 444.79                     | 399.89   |
| Pennsylvania   | 415.94                     | 439.06   | 476.01                     | 487.05   |
| Rhode Island   | 345.44                     | 386.94   | 456.34                     | 412.99   |

(continued)

**Supplementary Table SII Continued**

| State          | Post-Wave 1 fertility rate |          | Post-Wave 2 fertility rate |          |
|----------------|----------------------------|----------|----------------------------|----------|
|                | Observed                   | Expected | Observed                   | Expected |
| South Carolina | 455.91                     | 447.03   | 485.18                     | 476.38   |
| South Dakota   | 542.31                     | 528.63   | 615.87                     | 578.98   |
| Tennessee      | 491.32                     | 469.54   | 539.71                     | 527.42   |
| Texas          | 475.73                     | 465.12   | 541.51                     | 525.03   |
| Utah           | 582.48                     | 524.80   | 597.13                     | 542.17   |
| Vermont        | 337.56                     | 336.19   | 385.63                     | 362.34   |
| Virginia       | 431.39                     | 450.94   | 470.32                     | 470.26   |
| Washington     | 464.21                     | 434.92   | 479.77                     | 441.87   |
| West Virginia  | 465.77                     | 454.52   | 479.33                     | 503.01   |
| Wisconsin      | 450.26                     | 449.05   | 499.19                     | 495.77   |
| Wyoming        | 438.08                     | 439.80   | 517.46                     | 505.83   |
