# Supplementary material
Source: PubMed Central journal article supplement (PMC10233281)
Supplement: dead055_supplementary_table_siii.pdf [file dead055_supplementary_table_siii.pdf]

**Supplementary Table SIII** State-specific fertility rate changes pre-COVID and following each of the first two waves.

| State                | Annual change in average monthly fertility rate (births/month/100 000 women of reproductive age/year) |             |             |
|----------------------|-------------------------------------------------------------------------------------------------------|-------------|-------------|
|                      | Pre-COVID (2016–2019) <sup>a</sup>                                                                    | Post-Wave 1 | Post-Wave 2 |
| Alabama              | −0.94                                                                                                 | −2.42       | −9.91       |
| Alaska               | −22.21                                                                                                | 3.02        | −27.18      |
| Arizona              | −18.85                                                                                                | −4.53       | 11.36       |
| Arkansas             | −8.71                                                                                                 | −4.55       | 0.39        |
| California           | −14.65                                                                                                | −20.05      | −18.63      |
| Colorado             | −16.65                                                                                                | −11.16      | −3.67       |
| Connecticut          | −6.47                                                                                                 | −28.03      | 10.51       |
| District of Columbia | −16.82                                                                                                | −56.30      | −24.32      |
| Delaware             | −6.95                                                                                                 | −63.80      | −14.88      |
| Florida              | −8.61                                                                                                 | −5.34       | −5.53       |
| Georgia              | −8.67                                                                                                 | −3.86       | −5.23       |
| Hawaii               | −10.23                                                                                                | −19.05      | −27.06      |
| Idaho                | −16.16                                                                                                | 46.43       | 4.05        |
| Illinois             | −12.40                                                                                                | −45.59      | −22.97      |
| Indiana              | −7.08                                                                                                 | −39.29      | −5.15       |
| Iowa                 | −9.75                                                                                                 | −23.23      | −7.54       |
| Kansas               | −14.24                                                                                                | −27.04      | −13.34      |
| Kentucky             | −7.71                                                                                                 | 3.76        | −3.76       |
| Louisiana            | −9.12                                                                                                 | −25.39      | −19.21      |
| Maine                | −11.96                                                                                                | 9.29        | 13.47       |
| Maryland             | −5.78                                                                                                 | −54.84      | −14.91      |
| Massachusetts        | −6.51                                                                                                 | −37.17      | 0.52        |
| Michigan             | −8.43                                                                                                 | −34.54      | −5.82       |
| Minnesota            | −14.13                                                                                                | −25.42      | −10.56      |
| Mississippi          | −2.73                                                                                                 | −4.95       | −10.06      |
| Missouri             | −6.94                                                                                                 | 3.69        | −11.91      |
| Montana              | −23.83                                                                                                | 32.26       | 6.38        |
| Nebraska             | −16.65                                                                                                | −23.84      | −11.93      |
| Nevada               | −11.80                                                                                                | 5.54        | −16.25      |
| New Hampshire        | −7.63                                                                                                 | −8.26       | 17.20       |
| New Jersey           | −1.77                                                                                                 | −46.44      | −6.89       |
| New Mexico           | −14.03                                                                                                | −4.57       | −16.39      |
| New York             | −3.84                                                                                                 | −75.92      | −21.78      |
| North Carolina       | −7.11                                                                                                 | 1.04        | 5.26        |
| North Dakota         | −18.62                                                                                                | −8.37       | −25.48      |
| Ohio                 | −5.72                                                                                                 | 0.84        | −14.68      |
| Oklahoma             | −13.93                                                                                                | 7.25        | −15.38      |
| Oregon               | −17.97                                                                                                | 11.81       | 4.48        |
| Pennsylvania         | −6.00                                                                                                 | −29.11      | −11.52      |
| Rhode Island         | −8.33                                                                                                 | −49.83      | 13.35       |
| South Carolina       | −5.31                                                                                                 | 3.56        | −0.91       |

(continued)

**Supplementary Table SIII Continued**

| State         | Annual change in average monthly fertility rate (births/month/100 000 women of reproductive age/year) |             |             |
|---------------|-------------------------------------------------------------------------------------------------------|-------------|-------------|
|               | Pre-COVID (2016–2019) <sup>a</sup>                                                                    | Post-Wave 1 | Post-Wave 2 |
| South Dakota  | –19.50                                                                                                | –5.82       | –1.05       |
| Tennessee     | –4.73                                                                                                 | 17.05       | 1.41        |
| Texas         | –16.69                                                                                                | –6.08       | –8.45       |
| Utah          | –26.31                                                                                                | 31.36       | 1.17        |
| Vermont       | –9.75                                                                                                 | –8.38       | 1.89        |
| Virginia      | –9.35                                                                                                 | –28.90      | –9.32       |
| Washington    | –19.47                                                                                                | 9.82        | –0.52       |
| West Virginia | –1.82                                                                                                 | 9.43        | –13.66      |
| Wisconsin     | –9.80                                                                                                 | –8.59       | –8.09       |
| Wyoming       | –17.60                                                                                                | –19.32      | –11.78      |

<sup>a</sup>Pre-COVID fertility rate change: average annual change in average monthly fertility rate across 2016–2017, 2017–2018, and 2018–2019.

Pre-COVID: pre-coronavirus disease 2019.
