# Supplementary material
Source: PubMed Central journal article supplement (PMC10233281)
Supplement: dead055_supplementary_table_siv.pdf [file dead055_supplementary_table_siv.pdf]

**Supplementary Table SIV** Associations between COVID-19 severity and annual change in average monthly fertility rate (births/month/100 000 women of reproductive age/year) following Wave 1 and Wave 2, adjusted for employment change.

| Predictor                                                                 | Wave 1                  | Wave 2                |
|---------------------------------------------------------------------------|-------------------------|-----------------------|
|                                                                           | Adjusted b (95% CI)     | Adjusted b (95% CI)   |
| Wave severity (cases/100 000/month)                                       | −0.25 (−0.58, 0.09)     | 0.06 (−0.06, 0.19)    |
| Percentage voted Republican in 2020                                       | 0.44 (0.04, 0.84)       | −0.07 (−0.28, 0.15)   |
| Percentage non-White                                                      | −0.88 (−1.19, −0.56)    | −0.73 (−0.94, −0.52)  |
| Affordable housing units                                                  | −0.59 (−0.94, −0.25)    | −0.47 (−0.71, −0.23)  |
| Wave timing (Wave 1: Spring versus Summer;<br>Wave 2: Fall versus Winter) | −32.75 (−41.39, −24.12) | −9.24 (−15.78, −2.69) |
| Employment change                                                         | 0.01 (0.00, 0.02)       | 0.01 (0.00, 0.01)     |
| R-squared                                                                 | 0.82                    | 0.56                  |

COVID-19: coronavirus disease 2019; b: beta/effect estimate.
