# Supplementary material
Source: PubMed Central journal article supplement (PMC10233281)
Supplement: dead055_supplementary_table_sv.pdf [file dead055_supplementary_table_sv.pdf]

human reproduction **SUPPLEMENTARY DATA**

**Supplementary Table SV** Wave I results stratified by political leaning.

| Predictor                           | Majority voted Republican in 2020 |                         | Majority voted Democrat in 2020 |                         |
|-------------------------------------|-----------------------------------|-------------------------|---------------------------------|-------------------------|
|                                     | Unadjusted b (95% CI)             | Adjusted b (95% CI)     | Unadjusted b (95% CI)           | Adjusted b (95% CI)     |
| Wave severity (cases/100 000/month) | 0.13 (−0.79, 1.05)                | 0.32 (−0.39, 1.02)      | −0.83 (−1.49, −0.16)            | −0.38 (−0.89, 0.13)     |
| Percent non-White                   |                                   | −1.05 (−1.65, −0.45)    |                                 | −1.02 (−1.49, −0.55)    |
| Affordable housing units            |                                   | −0.12 (−0.68, 0.43)     |                                 | −0.41 (−1.17, 0.34)     |
| Wave timing (Spring vs. Summer)     |                                   | −36.41 (−49.19, −23.62) |                                 | −37.93 (−56.59, −19.26) |

b: beta/effect estimate.
