# Supplementary material
Source: PubMed Central journal article supplement (PMC10233281)
Supplement: dead055_supplementary_table_svi.pdf [file dead055_supplementary_table_svi.pdf]

**Supplementary Table SVI Wave 2 results stratified by political leaning.**

| Predictor                               | Majority voted Republican in 2020 |                      | Majority voted Democrat in 2020 |                      |
|-----------------------------------------|-----------------------------------|----------------------|---------------------------------|----------------------|
|                                         | Unadjusted b (95% CI)             | Adjusted b (95% CI)  | Unadjusted b (95% CI)           | Adjusted b (95% CI)  |
| Wave severity (cases/<br>100 000/month) | −0.05 (−0.19, 0.09)               | −0.01 (−0.23, 0.2)   | −0.02 (−0.22, 0.18)             | 0.03 (−0.15, 0.21)   |
| Percentage non-White                    |                                   | −0.8 (−1.27, −0.32)  |                                 | −0.66 (−0.96, −0.36) |
| Affordable housing units                |                                   | −0.41 (−0.75, −0.06) |                                 | −0.18 (−0.59, 0.23)  |
| Wave timing (Fall versus<br>Winter)     |                                   | −7.45 (−17.31, 2.4)  |                                 | −6.38 (−16.44, 3.68) |

b: beta/effect estimate.
