# Supplementary material
Source: PubMed Central journal article supplement (PMC10233281)
Supplement: dead055_supplementary_table_svii.pdf [file dead055_supplementary_table_svii.pdf]

human reproduction **SUPPLEMENTARY DATA**

**Supplementary Table SVII** Sensitivity analysis adjusting for population movement between US states.

| Predictor                                                                 | Wave 1                 | Wave 2               |
|---------------------------------------------------------------------------|------------------------|----------------------|
|                                                                           | Adjusted b (95% CI)    | Adjusted b (95% CI)  |
| Wave severity (cases/100 000/month)                                       | -0.32 (-0.67, 0.04)    | 0.01 (-0.12, 0.13)   |
| Percentage voted Republican in 2020                                       | 0.43 (0, 0.86)         | -0.06 (-0.28, 0.17)  |
| Percentage non-White                                                      | -0.92 (-1.26, -0.59)   | -0.72 (-0.94, -0.49) |
| Affordable housing units                                                  | -0.41 (-0.77, -0.05)   | -0.32 (-0.55, -0.09) |
| Wave timing (Wave 1: Spring versus Summer;<br>Wave 2: Fall versus Winter) | -31.99 (-41.28, -22.7) | -6.79 (-13.3, -0.28) |
| R-squared                                                                 | 0.78                   | 0.45                 |

b: beta/effect estimate.
