# Supplementary material
Source: PubMed Central journal article supplement (PMC10233281)
Supplement: dead055_supplementary_table_sviii.pdf [file dead055_supplementary_table_sviii.pdf]

**Supplementary Table SVIII** Sensitivity analysis adjusting for secular trend in annual change in monthly fertility rate.

| Predictor                                                                                      | Wave 1                   | Wave 2                |
|------------------------------------------------------------------------------------------------|--------------------------|-----------------------|
|                                                                                                | Adjusted b (95% CI)      | Adjusted b (95% CI)   |
| Wave severity (cases/100 000/month)                                                            | −0.14 (−0.49, 0.21)      | 0.01 (−0.12, 0.14)    |
| Percentage voted Republican in 2020                                                            | 0.4 (0, 0.8)             | −0.05 (−0.28, 0.17)   |
| Percentage non-White                                                                           | −0.83 (−1.15, −0.51)     | −0.72 (−0.95, −0.5)   |
| Affordable housing units                                                                       | −0.32 (−0.67, 0.02)      | −0.34 (−0.58, −0.11)  |
| Wave timing (Wave 1: Spring versus Summer;<br>Wave 2: Fall versus Winter)                      | −33.7 (−42.38, −25.02)   | −6.67 (−13.79, 0.46)  |
| Secular fertility trend (averaging annual change in average monthly fertility rate, 2016–2019) | −90.78 (−148.62, −32.93) | −0.12 (−47.69, 47.45) |
| R-squared                                                                                      | 0.82                     | 0.50                  |

b: beta/effect estimate.
